# Supplementary material for: The distinct role of ALDH1A1 and ALDH1A3 in the regulation of prostate cancer metastases
Source: bioRxiv or medRxiv preprint supplement (doi:10.1101/2021.05.08.443223), 2021-05-10
Supplement: Supplementary file [file media-1.pdf]

**Supplementary tables:****Table S1.** shRNA constructs used for knockdown of Aldh1a1 and Aldh1a3.**Table S2.** siRNA oligos, primers and antibodies used in the study.

Table S 1. shRNA constructs used for knockdown of Aldh1a1 and Aldh1a3.

| Gene          | Name      | Vector | Hairpin sequence                                      |
|---------------|-----------|--------|-------------------------------------------------------|
| Non-silencing | shNS      | pLKO.1 | CCTAAGGTTAAGTCGCCCTCGCTC<br>GAGCGAGGGCGACTTAACCTTAGG  |
| Aldh1a1       | shAldh1a1 | pLKO.1 | CCCAGTTCTTATCCAAGAATACTC<br>GAGTATTCTTCGGATAAGAAGTGGG |
| Aldh1a3       | shAldh1a3 | pLKO.1 | CGAATCCAAGAGTGGAAGAACTC<br>GAGTTTCTTCCACTCTTGGATTCTG  |

Table S2. siRNA oligos, primers and antibodies used in the study.

| siRNA oligos used for knockdown of gene expression |              |                                                                                                                        |
|----------------------------------------------------|--------------|------------------------------------------------------------------------------------------------------------------------|
| Gene                                               | siRNA name   | Sequence                                                                                                               |
| Scrambled siRNA                                    | siSCR        | ss GCAGCUAUAUGAAUGUUGUdTdT<br>as ACAACAUUCAUAUAGCUGCdTdT                                                               |
| ALDH1A1                                            | siALDH1A1 #1 | ss GAUCCAGGGCCGUACAAUAdTdT<br>as UAUUGUACGGCCCUGGAUCdTdT                                                               |
| ALDH1A1                                            | siALDH1A1 #2 | ss AGGUAGAAGAAGGAGAUAdTdT<br>as ACAACAUUCAUAUAGCUGCdTdT                                                                |
| ALDH1A3                                            | siALDH1A3 #1 | ss AGGAAAUGGCAGAGAACUAdTdT<br>as UAGUUCUCUGCCAUUUCCUdTdT                                                               |
| ALDH1A3                                            | siALDH1A3 #2 | ss UCGUGGAGGAGCAGGUCUAdTdT<br>as UAGACCUGCUCCUCCACGAdTdT                                                               |
| Scrambled siRNA pool                               | siSCR        | ss GCAGCUAUAUGAAUGUUGUdTdT<br>as ACAACAUUCAUAUAGCUGCdTdT<br>ss UGCGCUAGGCCUCGGUUGCdTdT<br>as GCAACCGAGGCCUAGCGCAdTdT   |
| AR                                                 | siAR         | ss CCAAAGGGCUAGAAGGCGAdTdT<br>as UCGCCUUCUAGCCCUUUGGdTdT<br>ss AUUGAUAAAUUCCGAAGGAdTdT<br>as UCCUUCGGAAUUUAUCAAUdTdT   |
| CTNNB1                                             | siCTNNB1     | ss GGGUACGAGCUGCUAUGUUDdTdT<br>as AACAUAGCAGCUCGUACCCdTdT<br>ss GGUGGUGGUUAAUAAGGCUdTdT<br>as AGCCUUAUUAACCACCACCDdTdT |

**Primers used for RT-qPCR**

| Gene    | Sequence (5'→3')                                                     |
|---------|----------------------------------------------------------------------|
| ACTB    | F 5'- ATGGAGTCCTGTGGCATCCA -3'<br>R 5'- AGTACTTGCGCTCAGGAGGA -3'     |
| RPLP0   | F 5'- CTCAACATCTCCCCCTTCTCCTT -3'<br>R 5'- TGATGCAACAGTTGGGTAGCC -3' |
| ALDH1A1 | F 5'- GAATGGCATGATTCAGTGAGTGG-3'<br>R 5'- CAGCCAACCTTGTATAATAGTCG-3' |
| ALDH1A3 | F 5'- TCTCGACAAAGCCCTGAAGT-3'                                        |

|                 |                                                                                                               |
|-----------------|---------------------------------------------------------------------------------------------------------------|
| AR              | R 5'- TATTCGGCCAAAGCGTATTC -3'<br>F 5'- CATCTTGTCGTCTTCGGAAATGTTA -3'                                         |
| CTNNB1          | R 5'- GAAGCCTCTCCTTCCTCCTGTAGTT -3'<br>F 5'- ATTTGATGGAGTTGGACATGGC-3'<br>R 5'- CCAGCTACTTGTTCTTGAGTGAAGG -3' |
| SMAD3           | F 5'- GCGTGCGGGTCTACTACATC -3'<br>R 5'- GCACATTCGGGTCAACTGGTA -3'                                             |
| TGFB1           | F 5'- CAGCAGGGATAACACACTGC -3'<br>R 5'- CACGCAGCAGTTCTTCTCC -3'                                               |
| Mouse/rat Gapdh | F 5'- TTCAACGGCACAGTCAAGG -3'<br>R 5'- ACATACTCAGCACCAGCATCAC -3'                                             |
| Mouse Aldh1a1   | F 5'- AACTTGTTCGGATTTAGGAGGCT-3'<br>R 5'- GGGCCTATCTTCCAAATGAACA -3'                                          |
| Mouse Aldh1a3   | F 5'- GGGTCACACTGGAGCTAGGA -3'<br>R 5'- CTGGCCTCTTCTTGGCGAA -3'                                               |

---

**Antibodies used for Immunofluorescence**

| <b>Antibody</b>                      | <b>Dilution and host</b> | <b>Vendor and catalogue number</b>   |
|--------------------------------------|--------------------------|--------------------------------------|
| Endomucin                            | 1:200, Goat              | Thermo Fisher Scientific, #PA5-47648 |
| GFP Tag                              | 1:200, Rabbit            | Thermo Fisher Scientific, #A6455     |
| Anti-Goat IgG<br>(Alexa Fluor 555)   | 1:350, Donkey            |                                      |
| Anti-Rabbit IgG<br>(Alexa Fluor 488) | 1:350, Donkey            |                                      |

---

## **Supplementary Figures:**

**Figure S1.** ALDH1A1 and ALDH1A3 as regulators of radiosensitivity.

**Figure S2.** Correlation analysis of ALDH1A1 or ALDH1A3 expression in the TCGA PRAD dataset with RT2 signatures.

**Figure S3.** qPCR validation of 84 extracellular matrix and adhesion genes analysed using DNA RT<sup>2</sup> Profiler PCR Array.

**Figure S4.** Disease-free survival of prostate cancer patients with high or low ALDH1A1 and ALDH1A3 expression.

**Figure S5.** Survival and extravasation potential of color-coded PC3 cells.

**Figure S6.** Comparison of the iPSA serum level and nuclear AR between tumors with or without ALDH1A1 or ALDH1A3 expression.

**Figure S7.** Analysis of the osteogenesis-related genes.

**Figure S8.** Interconnection of ALDH genes with MMPs.

# Supplementary Figure S1

LNCaP

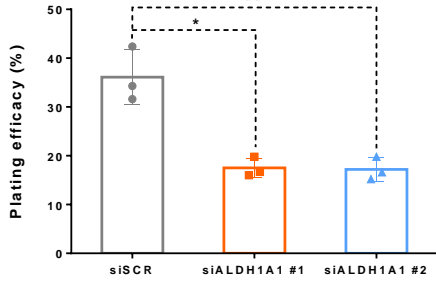

C42B

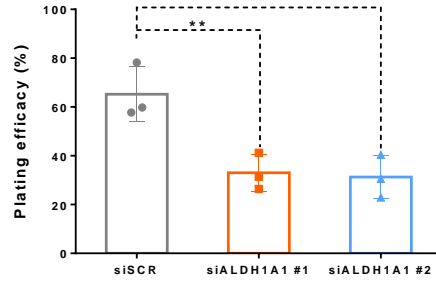

PC3

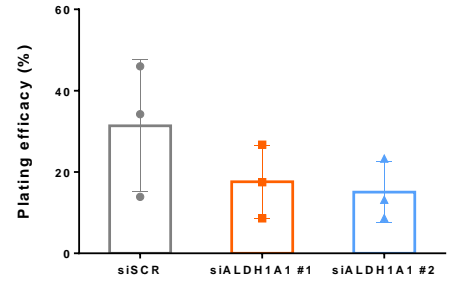

LNCaP

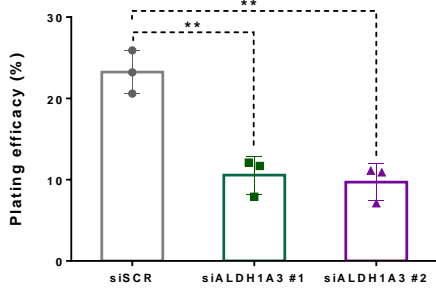

C42B

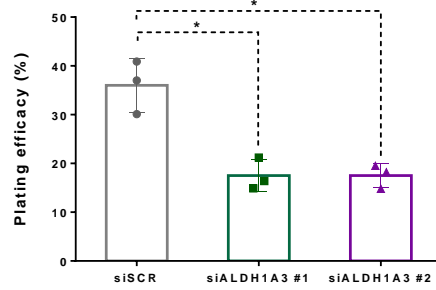

PC3

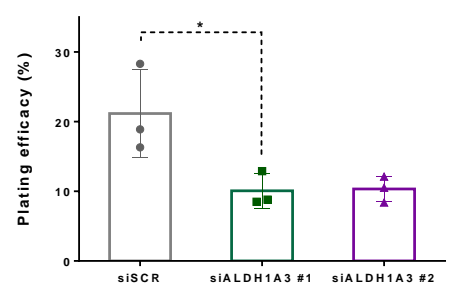

# Supplementary Figure S2

## Extracellular Matrix and Adhesion Molecules

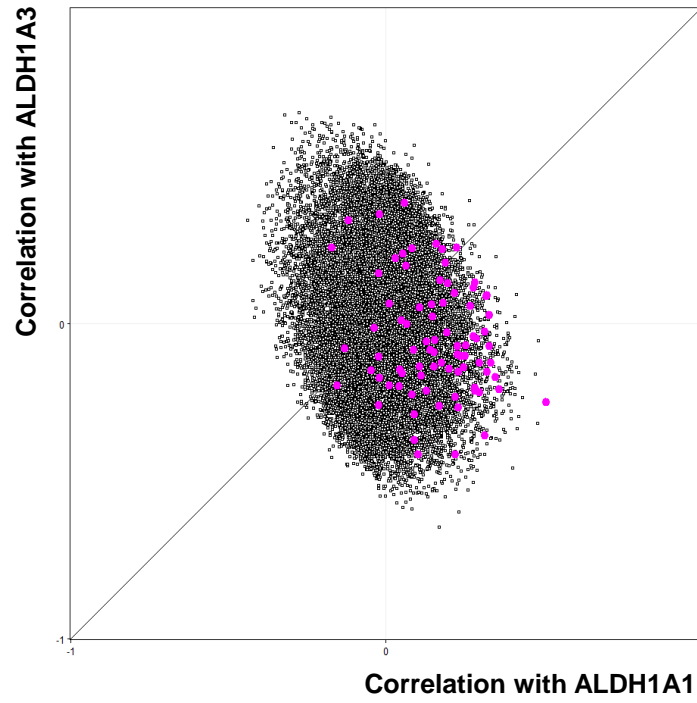

## Androgen Receptor Signaling

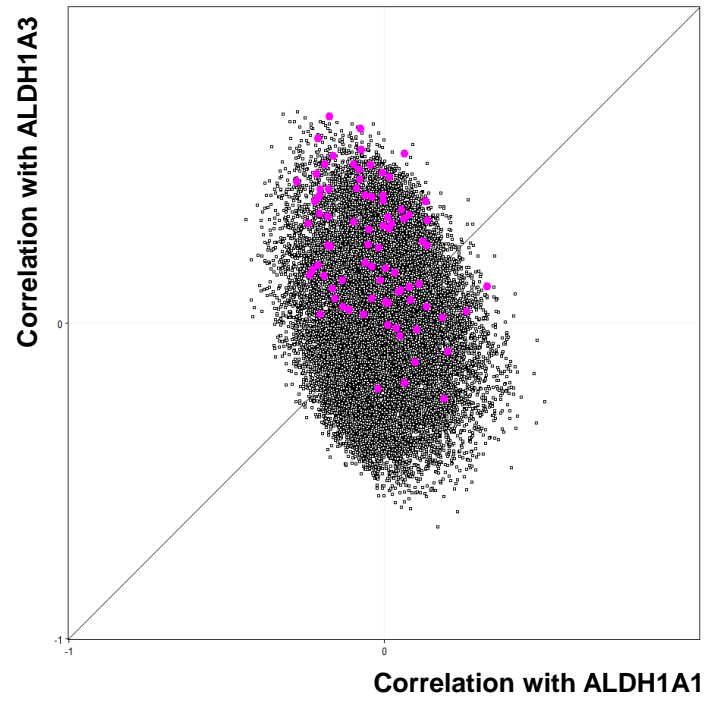

## Osteogenesis

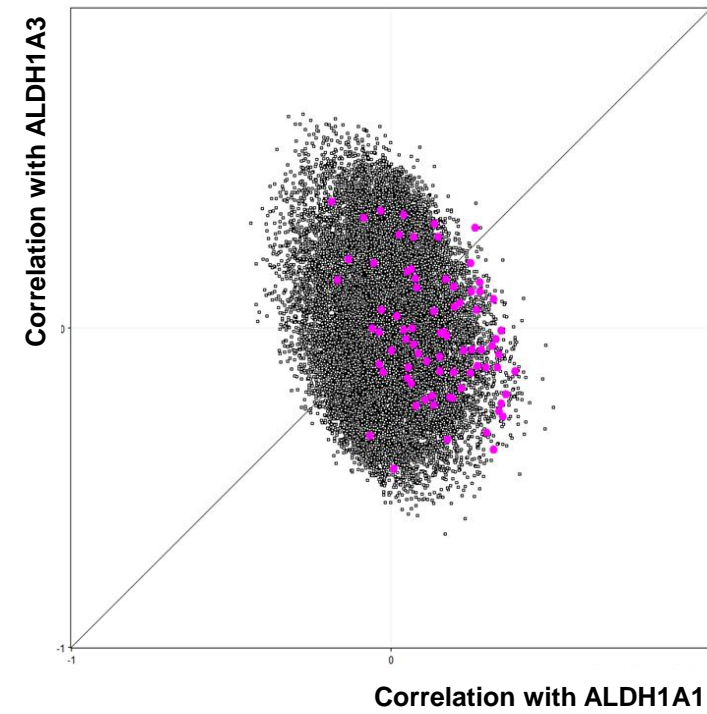

## Angiogenesis

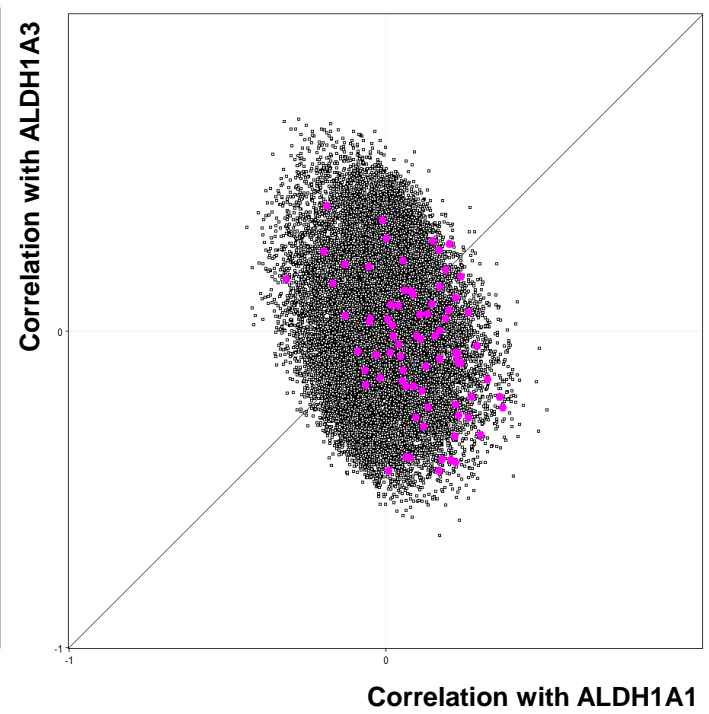

# Supplementary Figure S3

|          | LNCaP     |           |  |          | PC3       |           |
|----------|-----------|-----------|--|----------|-----------|-----------|
|          | siALDH1A1 | siALDH1A3 |  |          | siALDH1A1 | siALDH1A3 |
| ITGA8    | 3,4457424 | 13,176562 |  | ADAMTS1  | 2,5456312 | 1,2379519 |
| ITGA1    | 3,3190363 | 2,5670124 |  | ADAMTS13 | 2,4899838 | 1,7253882 |
| SELE     | 2,8402345 | 1,9934559 |  | COL7A1   | 2,4816593 | 3,2576491 |
| LAMB1    | 1,8026658 | 1,7948206 |  | COL16A1  | 2,4191095 | 3,4794358 |
| MMP8     | 1,7800653 | 1,8855528 |  | VTN      | 1,9934757 | 0,9320517 |
| COL14A1  | 1,6748544 | 3,5283427 |  | ITGAM    | 1,9313438 | 1,3742763 |
| VTN      | 1,6677947 | 1,6008062 |  | COL14A1  | 1,91886   | 1,7008488 |
| ITGB3    | 1,597696  | 2,1582947 |  | VCAN     | 1,9041017 | 0,9428615 |
| MMP3     | 1,5931042 | 0,7725707 |  | COL12A1  | 1,7694796 | 1,2398371 |
| MMP10    | 1,5807678 | 0,3869222 |  | LAMB1    | 1,7525492 | 1,0384546 |
| MMP9     | 1,4836756 | 0,9496065 |  | ITGA7    | 1,6752365 | 1,5290232 |
| ITGA2    | 1,3291003 | 0,6567818 |  | LAMA3    | 1,6398663 | 1,1025826 |
| PECAM1   | 1,2995651 | 1,7689802 |  | LAMA1    | 1,553781  | 0,3770434 |
| ICAM1    | 1,2680028 | 1,0782503 |  | MMP7     | 1,5237628 | 0,733172  |
| COL4A2   | 1,2524879 | 1,2067284 |  | TIMP2    | 1,5073309 | 0,5509773 |
| THBS3    | 1,1880757 | 0,8636981 |  | THBS3    | 1,4554457 | 1,4294116 |
| SPG7     | 1,1627652 | 1,9019644 |  | ICAM1    | 1,4349864 | 1,1119441 |
| COL7A1   | 1,1585684 | 1,2383869 |  | MMP12    | 1,4180188 | 1,7192085 |
| ITGB1    | 1,1448859 | 1,14006   |  | ITGAV    | 1,4154902 | 1,4296441 |
| ADAMTS13 | 1,1315893 | 1,1552432 |  | VCAM1    | 1,4075145 | 3,412206  |
| MMP13    | 1,122938  | 0,6891376 |  | LAMC1    | 1,3905187 | 1,1085608 |
| TGFBI    | 1,0978999 | 0,8807619 |  | MMP15    | 1,3893775 | 0,7165384 |
| COL1A1   | 1,0977011 | 0,9863823 |  | THBS2    | 1,3845623 | 1,6625503 |
| ITGA4    | 1,0878769 | 0,2124813 |  | SPG7     | 1,3782269 | 1,009498  |
| LAMC1    | 1,0401072 | 1,0576065 |  | SELE     | 1,33      | 0,7924925 |
| TIMP2    | 1,034769  | 0,7548247 |  | TIMP1    | 1,3329303 | 0,6703062 |
| LAMA3    | 1,0317555 | 1,8088347 |  | ITGA2    | 1,3112203 | 0,8404221 |
| ADAMTS8  | 1,0021507 | 1,4579233 |  | HAS1     | 1,2904627 | 0,9911907 |
| ITGAV    | 0,9775376 | 1,0227054 |  | MMP16    | 1,2864494 | 1,5395976 |
| NCAM1    | 0,9751716 | 1,1230701 |  | CLEC38   | 1,2562167 | 1,2960533 |
| COL6A2   | 0,9688324 | 1,1562884 |  | ITGA5    | 1,2492804 | 1,3850067 |
| ITGA7    | 0,9675012 | 0,851476  |  | ECM1     | 1,1973863 | 2,011028  |
| COL16A1  | 0,9626171 | 1,1075554 |  | SGCE     | 1,1905576 | 0,8772027 |
| MMP12    | 0,9606135 | 0,8372479 |  | CTNNB1   | 1,161265  | 1,0290504 |
| CDH1     | 0,9400942 | 1,0851935 |  | ITGB4    | 1,1529279 | 1,3502799 |
| MMP16    | 0,9373515 | 2,9326135 |  | ADAMTS8  | 1,1280559 | 1,2660885 |
| ADAMTS1  | 0,9283781 | 1,147903  |  | ITGA4    | 1,0983899 | 1,6256578 |
| MMP15    | 0,9188098 | 1,2483633 |  | COL1A1   | 1,090569  | 2,1716679 |
| CTNNB1   | 0,9066081 | 0,9445517 |  | CCN2     | 1,0466456 | 0,6457103 |
| COL12A1  | 0,8844819 | 1,4549272 |  | COL4A2   | 1,0433044 | 0,8014654 |
| ITGAL    | 0,8809342 | 0,8944822 |  | COL5A1   | 1,0384563 | 0,7542075 |
| THBS1    | 0,8725112 | 2,3957273 |  | ITGB1    | 1,0339793 | 0,9750346 |
| ECM1     | 0,869554  | 1,8347866 |  | LAMA2    | 1,0326569 | 1,283846  |
| ITGA5    | 0,8644463 | 1,0651375 |  | CNTN1    | 1,0259969 | 1,6086714 |
| MMP11    | 0,8582322 | 0,7557293 |  | COL6A1   | 1,0210848 | 1,4432137 |
| HAS1     | 0,8576526 | 0,7661647 |  | SELL     | 1,01      | 1,4612911 |
| LAMB3    | 0,8434573 | 2,437513  |  | MMP14    | 1,0027862 | 0,6310447 |
| CTNND1   | 0,8338764 | 1,1585378 |  | CTNND1   | 0,9969843 | 0,9894442 |
| ITGA6    | 0,8330478 | 0,9970363 |  | ITGA3    | 0,9852726 | 1,5170697 |
| SGCE     | 0,8213126 | 0,9780573 |  | CCNNA1   | 0,9794878 | 1,7519162 |
| CCNNA1   | 0,8209316 | 1,0206037 |  | MMP9     | 0,968892  | 0,9657469 |
| ITGB5    | 0,8047896 | 0,7803178 |  | MMP11    | 0,9649789 | 1,5369416 |
| LAMA2    | 0,8009228 | 0,9926408 |  | TGFBI    | 0,9321974 | 0,8030554 |
| COL6A1   | 0,7879602 | 1,0667271 |  | COL6A2   | 0,9293094 | 0,9736498 |
| MMP7     | 0,7840893 | 0,7566001 |  | ITGB5    | 0,9088361 | 0,6444732 |
| MMP1     | 0,7831983 | 0,6783706 |  | SPP1     | 0,8934002 | 0,460759  |
| ITGA3    | 0,7761631 | 1,7270719 |  | CDH1     | 0,8517873 | 5,0105759 |
| FN1      | 0,7647732 | 1,0024687 |  | MMP3     | 0,8382109 | 0,4833455 |
| COL5A1   | 0,7641728 | 0,7017601 |  | ITGA6    | 0,8282865 | 1,1035918 |
| ITGB4    | 0,6895869 | 1,0211152 |  | ITGB3    | 0,8094661 | 0,3686243 |
| LAMA1    | 0,6640285 | 0,4835741 |  | MMP10    | 0,7854759 | 0,4220869 |
| ITGB2    | 0,6415707 | 1,0311173 |  | THBS1    | 0,7723966 | 1,8800374 |
| SELL     | 0,6392187 | 1,3916102 |  | CD44     | 0,7711538 | 1,2881271 |
| TIMP3    | 0,6117086 | 1,272633  |  | FN1      | 0,7458408 | 0,686763  |
| CLEC38   | 0,5540223 | 0,7528494 |  | TNC      | 0,720417  | 0,6379045 |
| CCN2     | 0,4157619 | 0,6769479 |  | ITGA1    | 0,7046165 | 1,0064237 |
| TNC      | 0,4044734 | 0,7966553 |  | ITGB2    | 0,6361033 | 1,3870517 |
| SPP1     | 0,336207  | 0,3857541 |  | CTNND2   | 0,6086106 | 0,8425904 |
| SPARC    | 0,2264424 | 0,606537  |  | ANOS1    | 0,4683601 | 0,6615725 |
|          |           |           |  | MMP13    | 0,4479699 | 0,518483  |
|          |           |           |  | COL8A1   | 0,3564923 | 1,4662142 |
|          |           |           |  | MMP1     | 0,3429869 | 0,3899497 |
|          |           |           |  | PECAM1   | 0,33      | 0,6189817 |
|          |           |           |  | SPARC    | 0,2649995 | 0,5830115 |

# Supplementary Figure S4

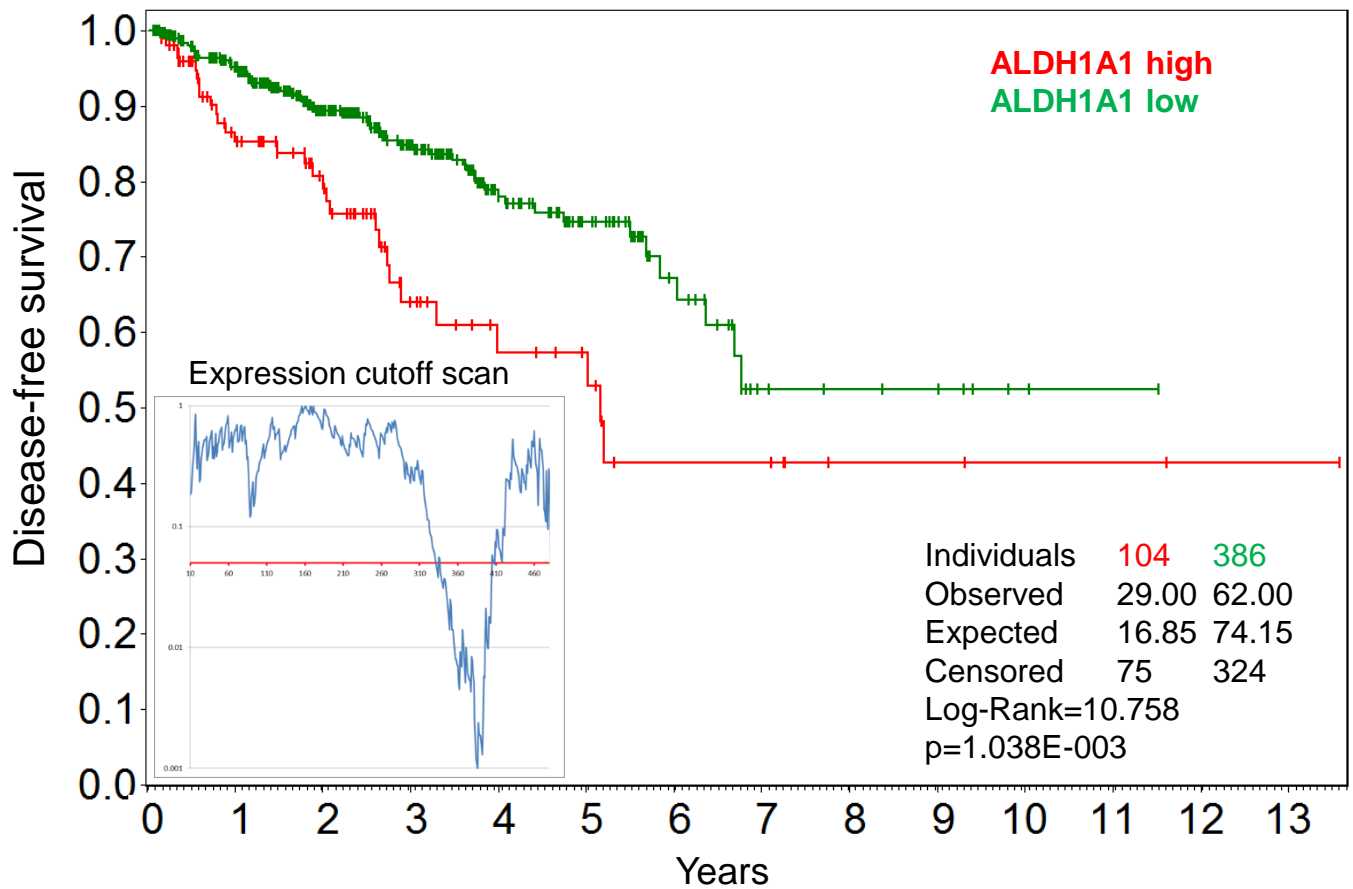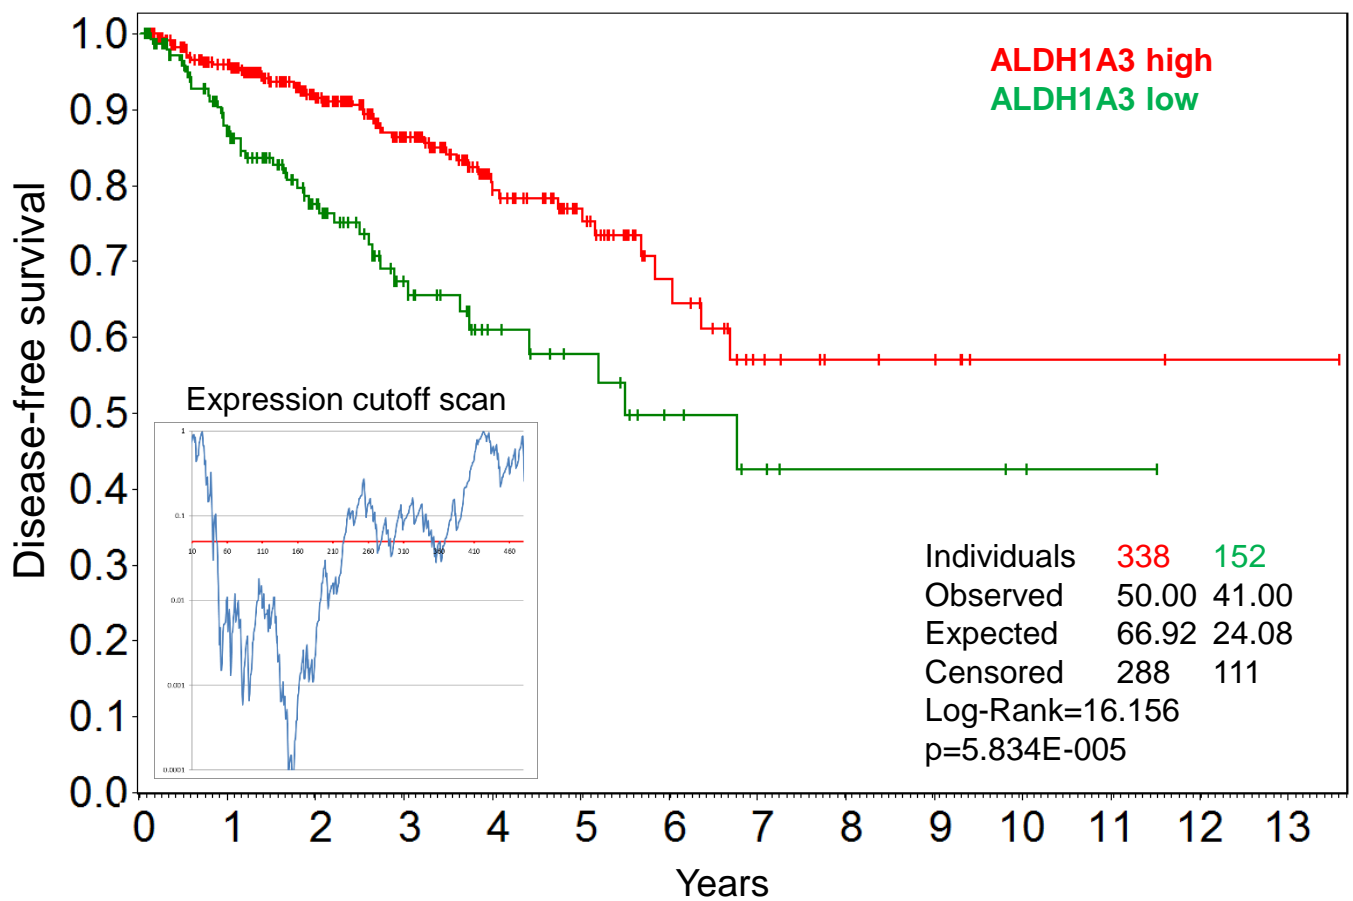

# Supplementary Figure S5

**A**

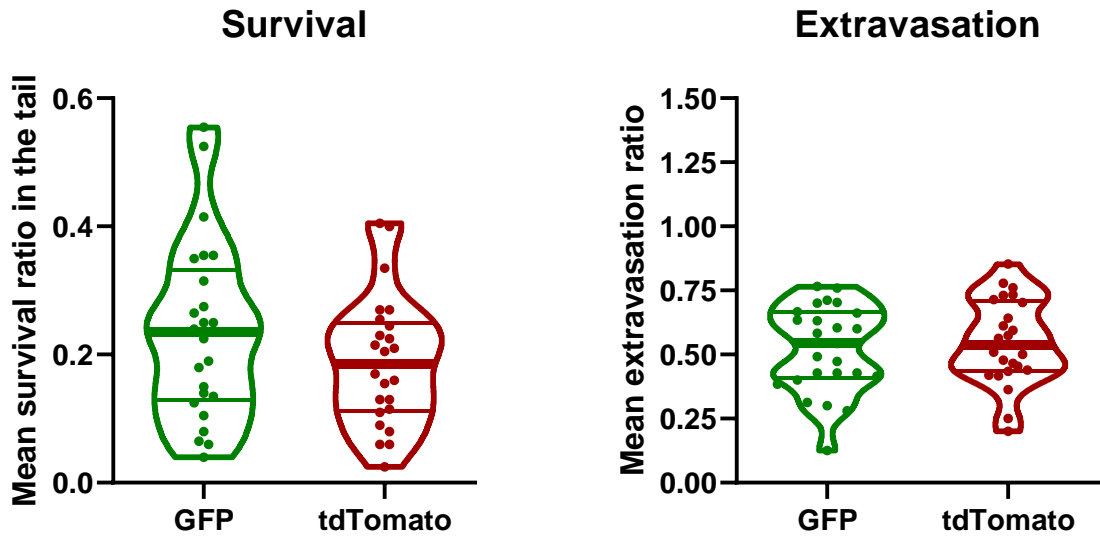

**B**

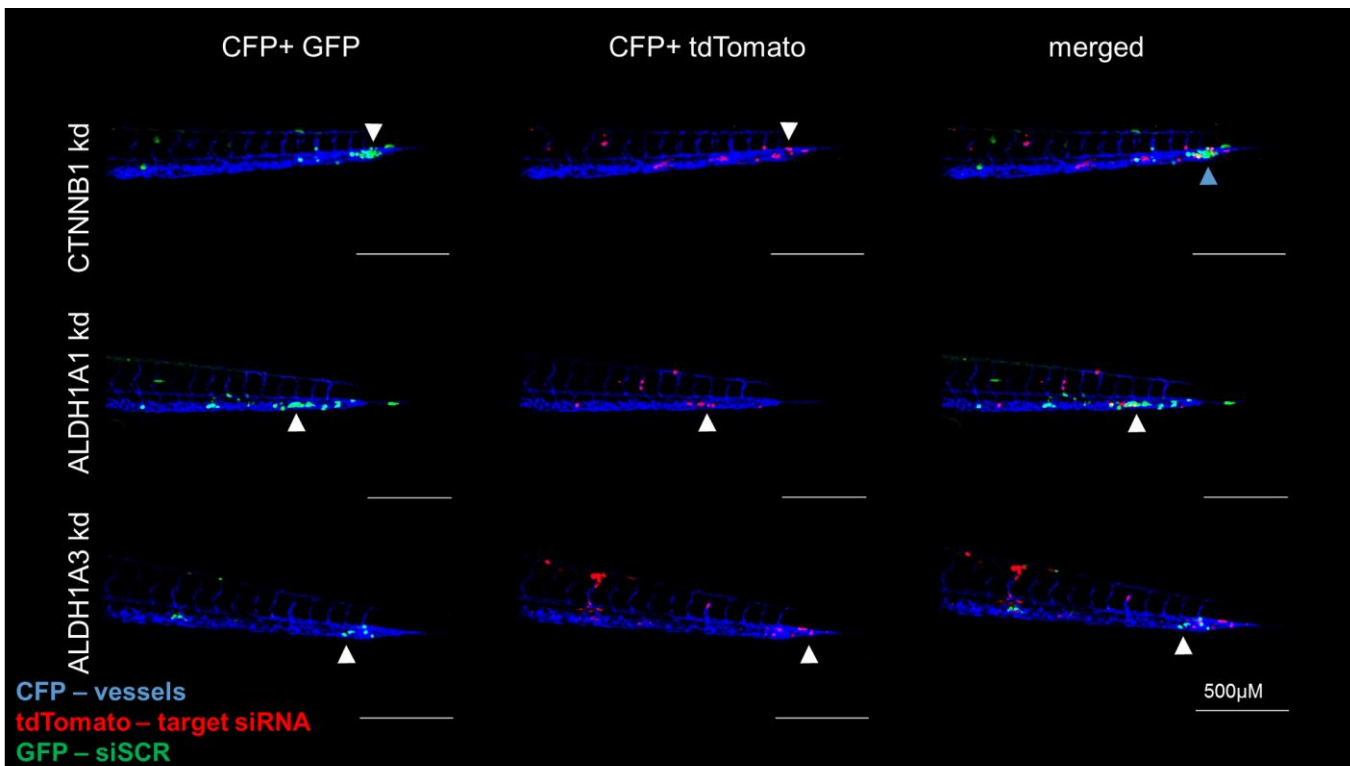



# Supplementary Figure S6

**A**

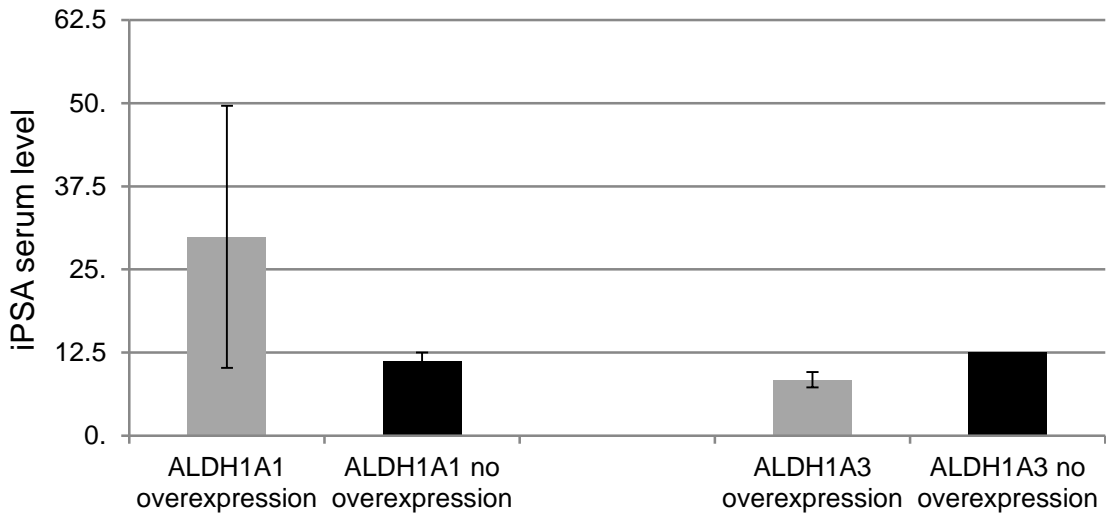

**B**

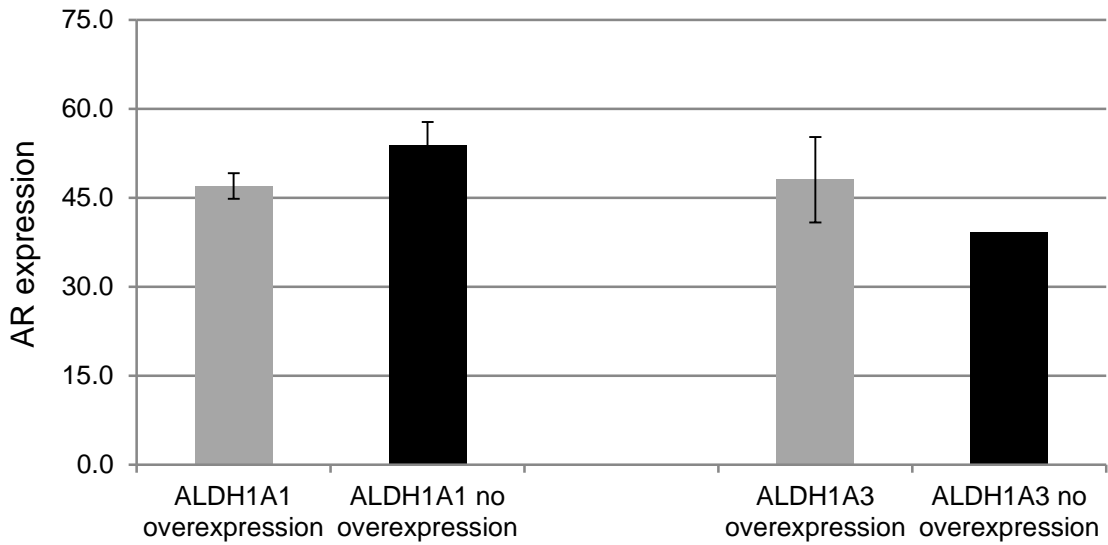

# Supplementary Figure S7

**A**

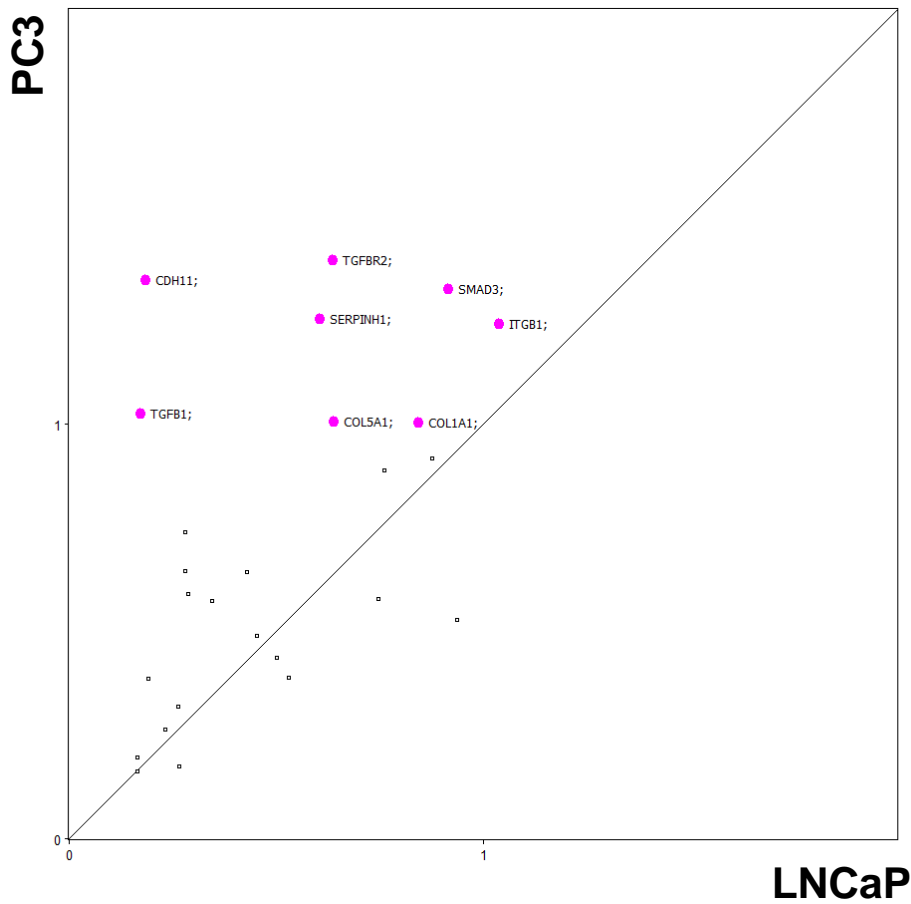

**B**

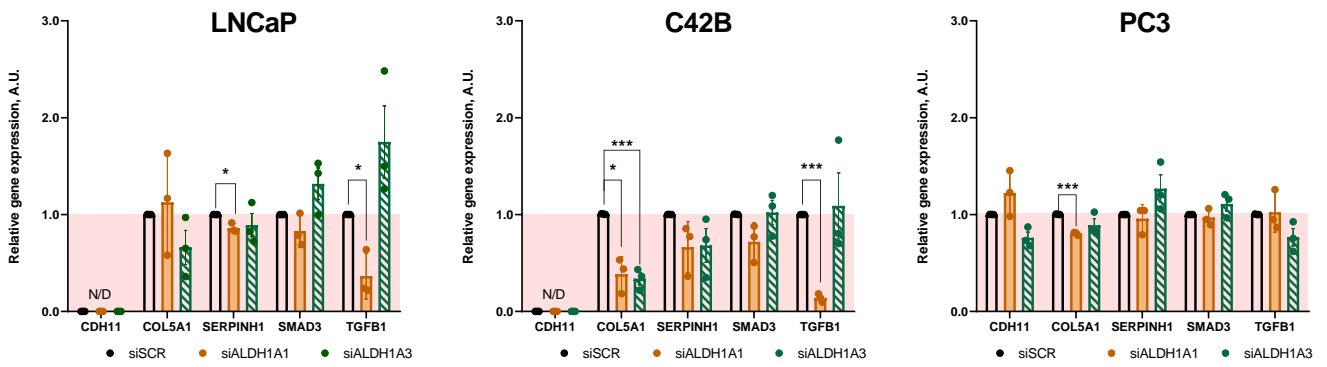

**C**

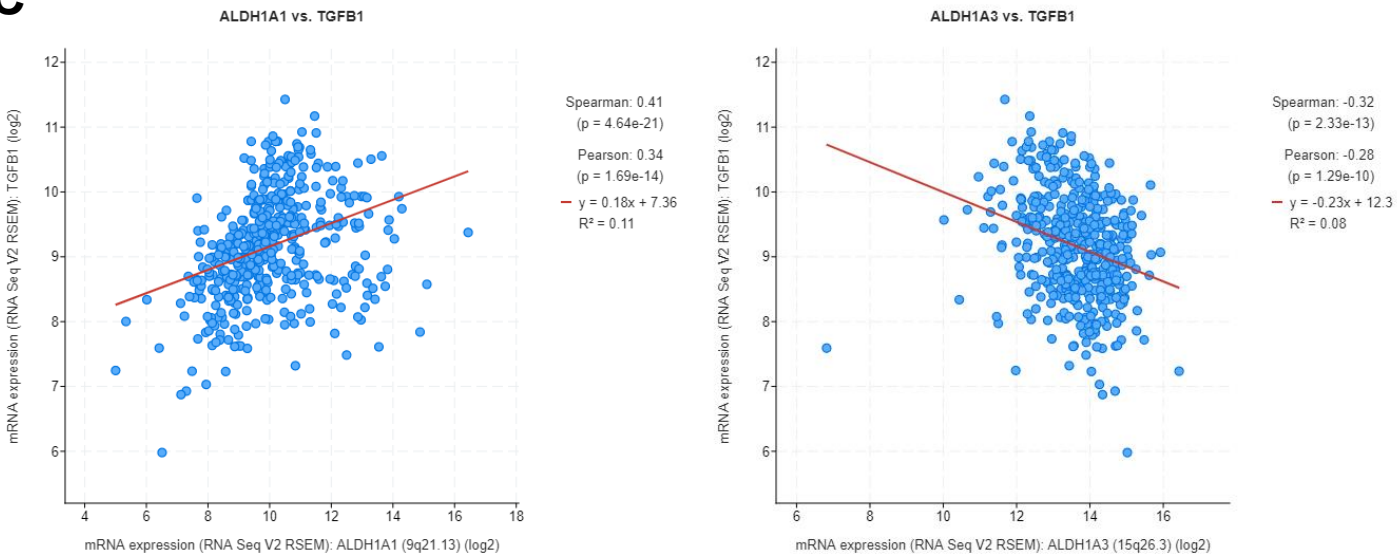

# Supplementary Figure S8

**A**

| LNCaP | ALDH1A1kd   | ALDH1A3kd   | PC3   | ALDH1A1kd  | ALDH1A3kd  |
|-------|-------------|-------------|-------|------------|------------|
| MMP1  | 0,783198275 | 0,678370572 | MMP1  | 0,3429869  | 0,38994966 |
| MMP7  | 0,784089265 | 0,756600085 | MMP13 | 0,44796986 | 0,51848302 |
| MMP11 | 0,858232194 | 0,755729342 | MMP10 | 0,78547594 | 0,42208688 |
| MMP15 | 0,918809791 | 1,248363293 | MMP3  | 0,83821089 | 0,48334545 |
| MMP16 | 0,937351456 | 2,932613542 | MMP11 | 0,9649789  | 1,5369416  |
| MMP12 | 0,960613538 | 0,837247884 | MMP9  | 0,96889195 | 0,9657469  |
| MMP13 | 1,122938011 | 0,689137573 | MMP14 | 1,00278618 | 0,63104465 |
| MMP9  | 1,483675634 | 0,949606482 | MMP16 | 1,28644942 | 1,53959762 |
| MMP10 | 1,580767792 | 0,386922226 | MMP15 | 1,38937753 | 0,7165384  |
| MMP3  | 1,593104239 | 0,772570745 | MMP12 | 1,41801883 | 1,71920845 |
| MMP8  | 1,780065293 | 1,885552818 | MMP7  | 1,52376282 | 0,73317204 |

**B**

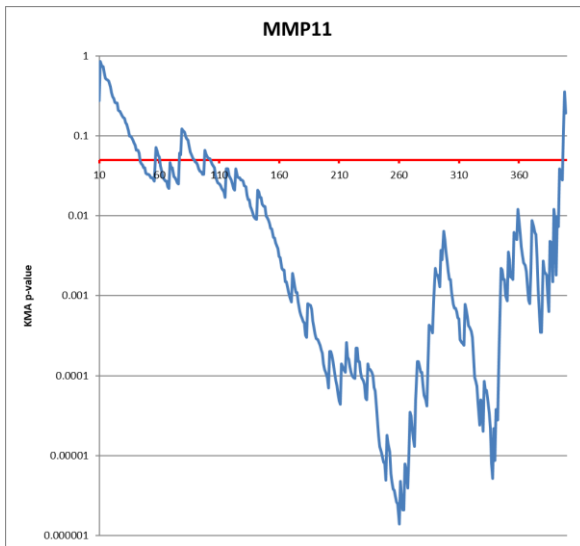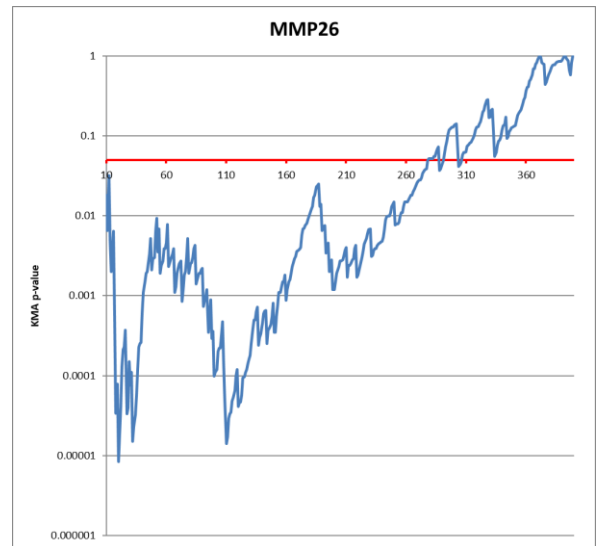

**C**

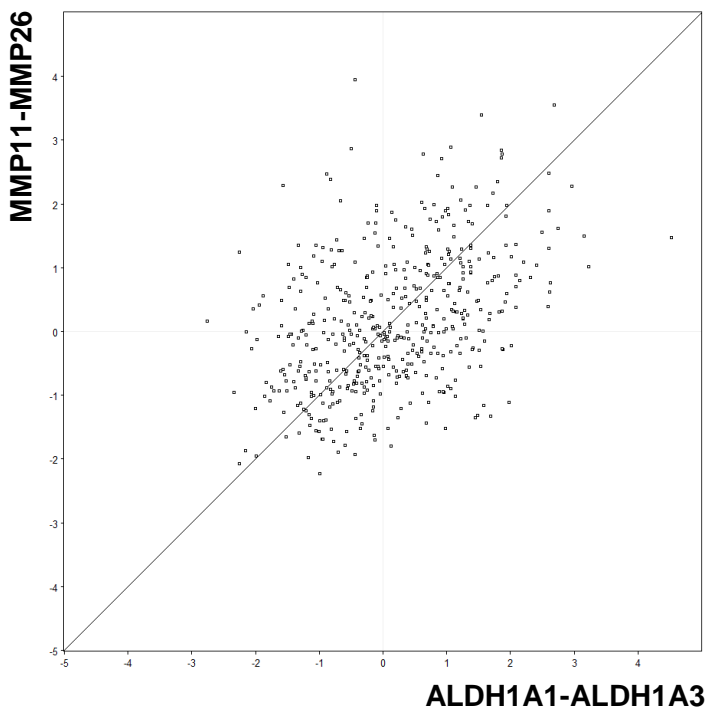

Pearson correlation coefficient:  
 ALDH1A1-ALDH1A3 / MMP11-MMP26;  
 n=490;r=0.42670; p=4.23E-023
